# Supplementary material
Source: MDPI journal article supplement (https://www.mdpi.com/2079-9276/10/12/123)
Supplement: s1 [file s1]

# Supplementary Materials: The Role of Edible Insects in Rural Livelihoods, and Identified Challenges in Vhembe District, Limpopo, South Africa

Zabentungwa T. Hlongwane \*, Rob Slotow and Thinandavha C. Munyai

School of Life Sciences, University of KwaZulu-Natal, Durban 4041, South Africa;  
slotow@ukzn.ac.za (R.S.); munyaic2@ukzn.ac.za (T.C.M.)

\* Correspondence: nolwazihlongwane20@gmail.com

## *Questionnaire to Source Information from Traders in Vhembe District, Limpopo*

Project title: Diversity of edible insects and their related indigenous knowledge by humans in Limpopo and KwaZulu-Natal province, South Africa.

You are invited to consider participating in a study that involves research on the consumption of edible insects using indigenous knowledge in South Africa. We would like to obtain insights on the socioeconomic benefits, drivers of consuming edible insects, and the attitudes that people have towards edible insects. The aim of this research is to determine the diversity and distribution of edible insects using indigenous knowledge in South Africa. Please note that your participation in this research is voluntary, and you may choose not to participate or you may discontinue your participation at any time without penalty or disadvantage to yourself.

In case there are questions considering the survey, please contact the researcher.

Traders

Date: \_\_\_\_\_

Questionnaire number: \_\_\_\_\_

Location: \_\_\_\_\_

Has the informed consent form been signed by the participant: Yes [ ]/No [ ]

1. 1. Gender Male: [ ] Female [ ]

2. What is your age?

Under 18 [ ]

18–24 years [ ]

25–34 years [ ]

35–44 years [ ]

45–54 years [ ]

55–64 years [ ]

65–74 years [ ]

75 or older [ ]

3. Level of education

Level zero [ ]

Primary school [ ]

High school [ ]

Post graduate [ ]

4. Employment status: unemployed [ ] self-employed [ ] pensioner [ ] employed [ ] sell insects for a living [ ]

5. Where do you buy or harvest insects for trading

Harvest them from the wild [ ]

Locally [ ]

Neighbouring villages.....if so provide names \_\_\_\_\_

In the city.... If so provide names \_\_\_\_\_

|              |                 |    |         |               |
|--------------|-----------------|----|---------|---------------|
| Neighbouring | provinces....if | so | provide | names         |
| Neighbouring | countries.....  | If | so      | provide names |

---

6. How do you prepare edible insects for selling?  
 Degutted, cleaned, and dried [ ]  
 Fried [ ]  
 Roasted [ ]  
 Boiled  
 Stewed  
 Other, specify \_\_\_\_\_

7. Are you a family breadwinner Yes [ ] or No [ ]; if yes, how many are you in your family \_\_\_\_\_

8. How long have you been selling edible insects? \_\_\_\_\_  
 Less than a year [ ]  
 1–5 years [ ]  
 6–10 years [ ]  
 11–15 years [ ]  
 16–20 years [ ]  
 21–30 years [ ]  
 Above 30 years [ ]

9. What are the challenges of selling insects?  
 \_\_\_\_\_  
 \_\_\_\_\_  
 \_\_\_\_\_  
 \_\_\_\_\_  
 \_\_\_\_\_

---

11. Do you and your family consume insects? Yes [ ] or No [ ]  
 12. If yes, with what do you consume insects? Pap [ ], rice [ ], or bread [ ]  
 13. Who are your regular customers?  
 Males [ ]  
 Females [ ]  
 Children [ ]  
 Teenagers [ ]  
 Older people [ ]

14. How many orders of insects do you sell? \_\_\_\_\_

15. How does insect availability differ with season?  
 \_\_\_\_\_  
 \_\_\_\_\_  
 \_\_\_\_\_

16. How do you store insects?  
 \_\_\_\_\_  
 \_\_\_\_\_  
 \_\_\_\_\_  
 \_\_\_\_\_

---

17. How much profit do you make from selling insects?  
 ZAR 100–200 per week [ ]  
 ZAR 300–500 per week [ ]  
 ZAR 600–1000 per week [ ]  
 ZAR 1100–1500 per week [ ]  
 ZAR 1600–2000 per week [ ]  
 Above ZAR 2000 per week [ ]

18. How did you get into the business of selling insects?

---

---

---

---

19. Are you aware of the nutritional benefits of consuming insects? Yes [ ] or No [ ]
